# Supplementary material for: Deep structured learning realizes variant prioritization for Mendelian diseases
Source: Research Square preprint supplement (doi:10.21203/rs.3.rs-1602211/v1), 2022-05-27
Supplement: Supplementary file 1 [file 282427d6baeca94bbc9cc1a1.xlsx]

## Sheet: S5
PatientID	Gene	Inheritance	MAVERICK Geno-only Rank	MAVERICK + HiPhive Rank	Exomiser Geno-only Rank	Exomiser Geno+Pheno Rank	HPO
Family1-Ind1	CADM3	AD	10	3	82	69	HP:0003477
Family2-Ind1	CADM3	AD	7	5	78	54	HP:0003477
Family3-Ind1	SORD	AR	3	3	103	72	HP:0003477
Family4-Ind1	SORD	AR	2	3	52	20	HP:0003477, HP:0001761, HP:0002355, HP:0009027, HP:0009053, HP:0008959
Family5-Ind1	SCO2	AR	90	3	15	3	HP:0000006, HP:0003477, HP:0001763, HP:0002355, HP:0007010, HP:0009027, HP:0009053, HP:0002936, HP:0003401, HP:0012534
Family6-Ind1	SORD	AR	6	3	114	97	HP:0003477, HP:0002355, HP:0009027, HP:0009053, HP:0002936, HP:0030177, HP:0001284
Family7-Ind1	ATP1A1	AD	11	1	1	1	HP:0000006, HP:0003477, HP:0001761, HP:0002355, HP:0007010, HP:0009027, HP:0002936, HP:0030177, HP:0003401, HP:0008959
Family8-Ind1	SORD	AR	6	2	178	116	HP:0002355, HP:0009027, HP:0009053, HP:0008959, HP:0030177, HP:0003477
Family9-Ind1	SORD	AR	3	3	104	75	HP:0003477, HP:0011463, HP:0001761, HP:0002355, HP:0007010, HP:0008959, HP:0002936, HP:0006886, HP:0007328, HP:0003401, HP:0030177, HP:0002600
Family10-Ind1	SCO2	AR	12	2	17	8	HP:0003477
Family11-Ind1	SORD	AR	9	3	90	72	HP:0003477, HP:0001761, HP:0002355, HP:0009027, HP:0009053, HP:0008959
Family12-Ind1	CADM3	AD	11	4	95	72	HP:0000006, HP:0003477, HP:0008959, HP:0030177, HP:0012534
Family13-Ind1	SORD	AR	5	2	114	85	HP:0003477, HP:0002355, HP:0009027, HP:0009053, HP:0002936
Family14-Ind1	SORD	AR	7	2	108	70	HP:0003477, HP:0001761, HP:0002355, HP:0009027, HP:0009053, HP:0002936, HP:0030177
Family15-Ind1	SORD	AR	7	3	152	103	HP:0000007, HP:0011463, HP:0001761, HP:0002355, HP:0009027, HP:0009053, HP:0030177, HP:0001284, HP:0008959
Family16-Ind1	SORD	AR	1	4	110	72	HP:0003477, HP:0001763, HP:0002355, HP:0009027, HP:0009053
Family17-Ind1	NEFH	AD	301	834	1	1	HP:0003477, HP:0000006, HP:0001761, HP:0009027, HP:0009053, HP:0008959
Family18-Ind1	SORD	AR	3	2	105	72	HP:0003477, HP:0007010, HP:0009053, HP:0008959, HP:0009027, HP:0006886, HP:0030177, HP:0002600
