# Supplementary material for: Deep structured learning realizes variant prioritization for Mendelian diseases
Source: Research Square preprint supplement (doi:10.21203/rs.3.rs-1602211/v1), 2022-05-27
Supplement: Supplementary file 1 [file a330de5c537ebc85736c429d.pdf]

## Deep structured learning realizes variant prioritization for Mendelian diseases

Matt C. Danzi, Maike F. Dohrn, Sarah Fazal, Danique Beijer, Adriana Rebelo, Vivian Cintra, and Stephan Züchner

### Supplementary Figure Legends

**Supplementary Figure 1: MAVERICK sub-model architecture 1.** Inputs are shown as grey boxes. Transformer-based layers are shown in blue. Densely-connected linear layers are shown in orange. The number of parameters is shown to the left of each layer. The size of the output of each layer is shown on its right side. The size of each densely-connected linear layer is given in parentheses within the layer. For the multi-head attention layers, sixteen attention heads were used. The weights are shared between the two stacks of transformer layers.

**Supplementary Figure 2: MAVERICK sub-model architecture 2.** Inputs are shown as grey boxes. Transformer-based layers are shown in blue. Densely-connected linear layers are shown in orange. The number of parameters is shown to the left of each layer. The size of the output of each layer is shown on its right side. The size of each densely-connected linear layer is given in parentheses within the layer. For the multi-head attention layers, sixteen attention heads were used. ProtT5-XL BFD was used as an additional feature extractor in this architecture.

**Supplementary Figure 3: MAVERICK exhibits excellent classification performance for benign, dominant, and recessive variants.** A-C) Violin plot of distributions of MAVERICK predictions for each of the three classes, separated by true class label. A) Validation set. B) Known genes test set. C) Novel genes test set. D) Relative performance of MAVERICK with different input components ablated by dropout. Performance is measured by the area under the precision-recall curve, averaged among the benign, dominant and recessive scores.

**Supplementary Figure 4: MAVERICK's predictions are well-calibrated.** A-B) Scatter plots of binned prediction values on the x-axis plotted against the proportion of those predictions for which this was the correct class on the y-axis. A perfectly calibrated model would have all its points fall on the  $x=y$  line. Calibration curves above the  $x=y$  line indicate under-confidence, while those under the  $x=y$  line indicate over-confidence. A) Calibration curve for the known genes test set. B) Calibration curve for the novel genes test set.

**Supplementary Figure 5: MAVERICK reliably prioritizes causal variants.** Cumulative proportion of cases solved by MAVERICK's rank ordering of variants when 98 control samples had pathogenic variants from the known and novel genes test sets spiked in. A) Performance on

the known genes test set separated according to the inheritance pattern of the spiked-in variant.

B) Performance on the novel genes test set separated according to the inheritance pattern of the spiked-in variant.

## **Supplementary Tables**

**Supplementary Table 1:** Classification performance of MAVERICK on the validation set, the known genes test set and the novel genes test set. For each class in each test set, the number of variants, precision, recall, F1-score, area under the receiver operating characteristic curve, and area under the precision-recall curve are given.

**Supplementary Table 2:** Comparison of MAVERICK classification performance to MAPPIN. For each class in the known and novel genes test sets, the number of variants evaluated is given, along with the precision and recall of MAVERICK and MAPPIN.

**Supplementary Table 3:** Comparison of MAVERICK classification performance to ALoFT. For each class in the known and novel genes test sets, the number of variants evaluated is given, along with the precision and recall of MAVERICK and ALoFT.

**Supplementary Table 4:** Comparison of MAVERICK classification performance to PrimateAI. For each class in the known and novel genes test sets, the number of variants evaluated is given, along with the precision and recall of MAVERICK and PrimateAI. Dominant and recessive variants were both included to create the ‘pathogenic’ class for this comparison.

**Supplementary Table 5:** Comparison of MAVERICK to Exomiser in solving real novel cases with and without phenotype information. For each case, the causal gene is shown, along with its mode of inheritance, the patient’s HPO terms, and the rank of the causal variant or variant pair when evaluated by MAVERICK using only genotype information, MAVERICK score averaged with HiPhive phenotype score, Exomiser using only genotype information, and Exomiser combined gene-level genotype and phenotype score.

**Supplementary Table 6:** Classification performance of MAVERICK on the X chromosome. For each class, the number of variants, precision, recall, F1-score, area under the receiver operating characteristic curve, and area under the precision-recall curve are given. These scores are again reported for the “binary” case where dominant and recessive variants are grouped together as “pathogenic”.

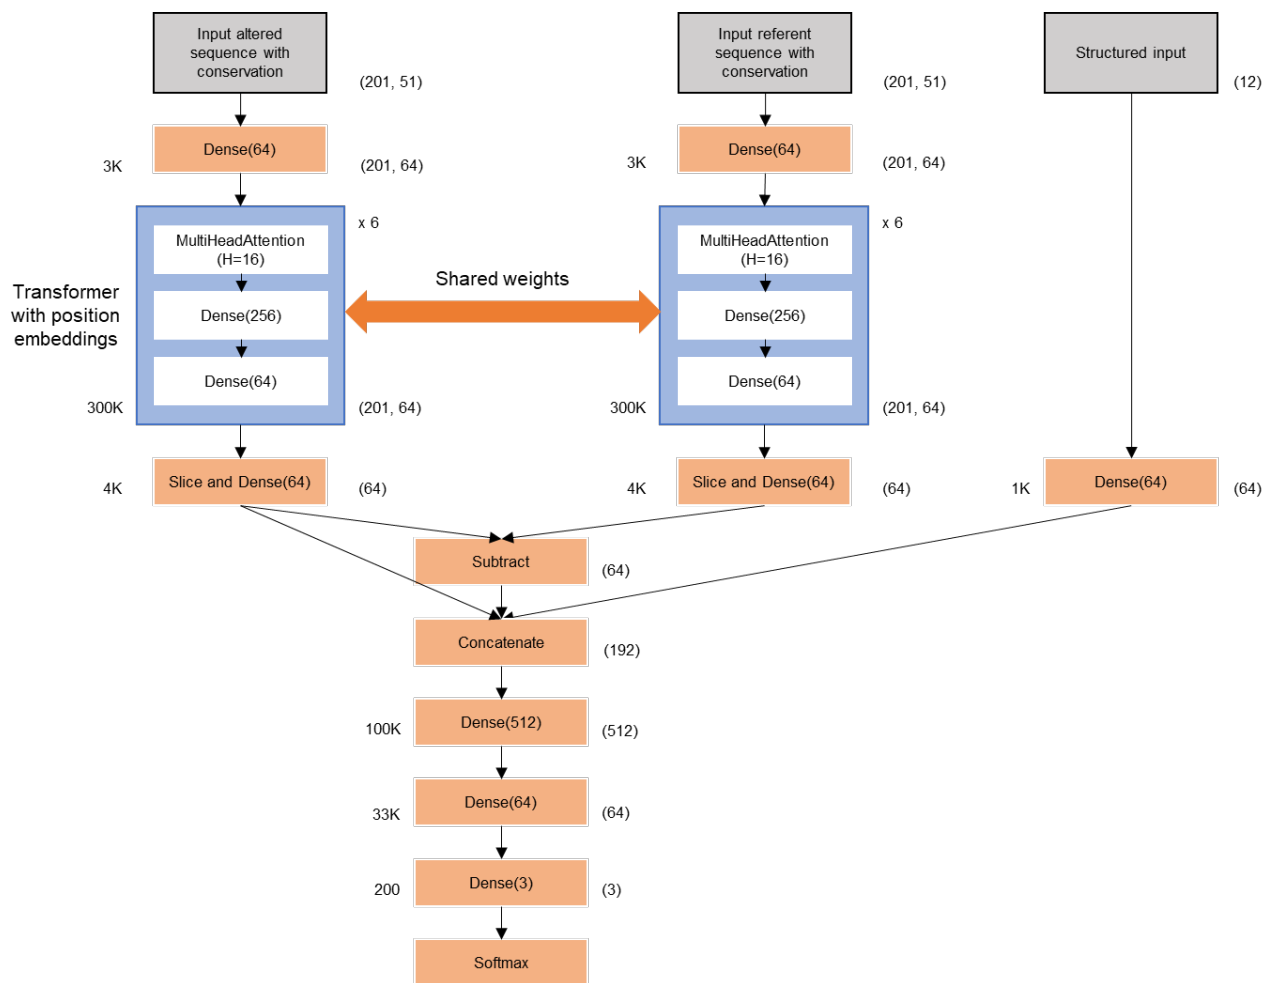

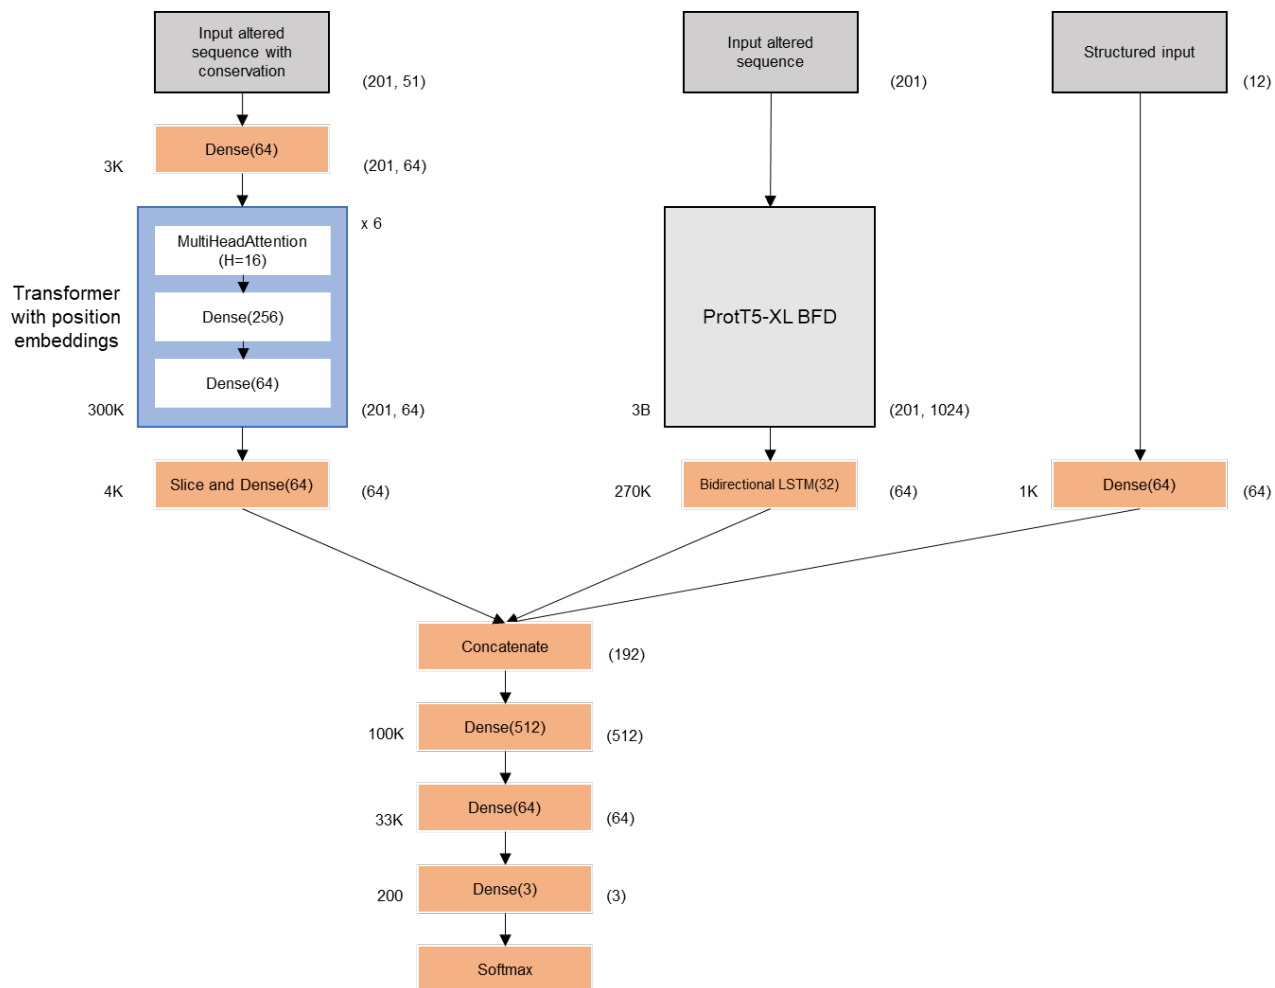

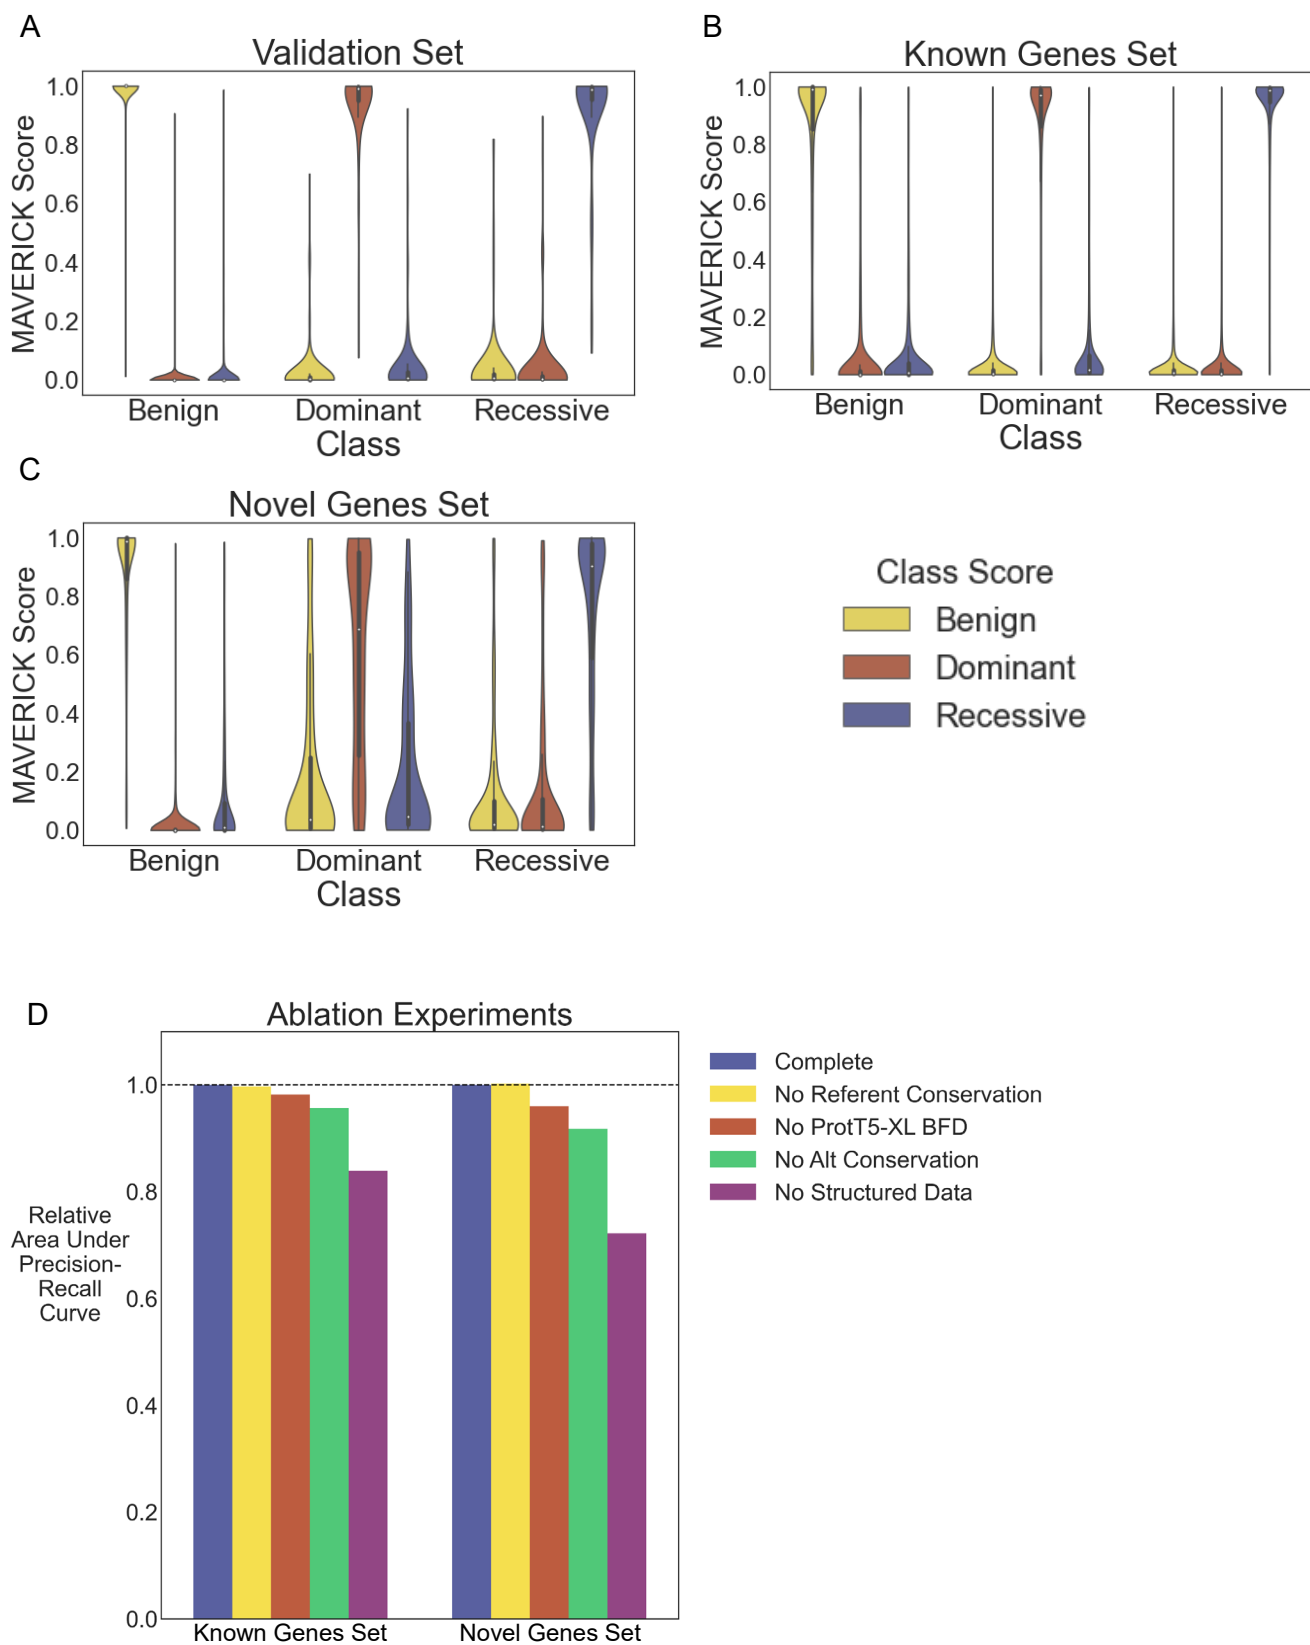

A

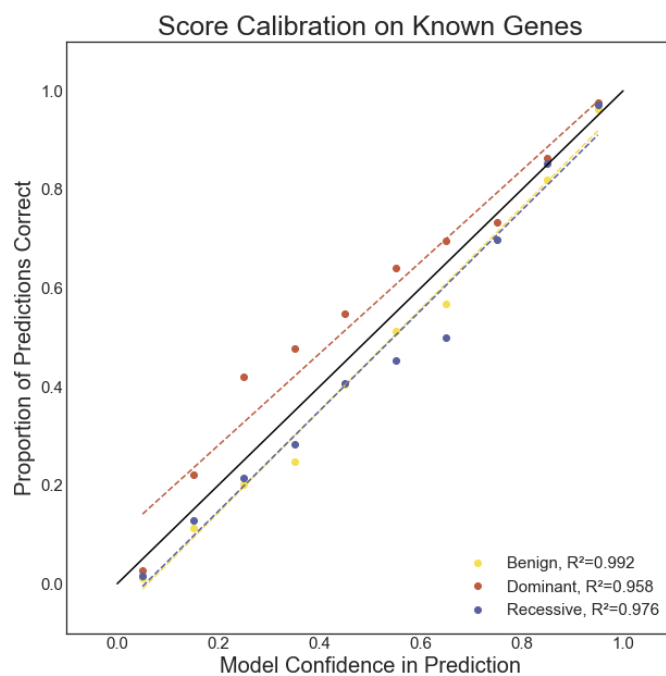

B

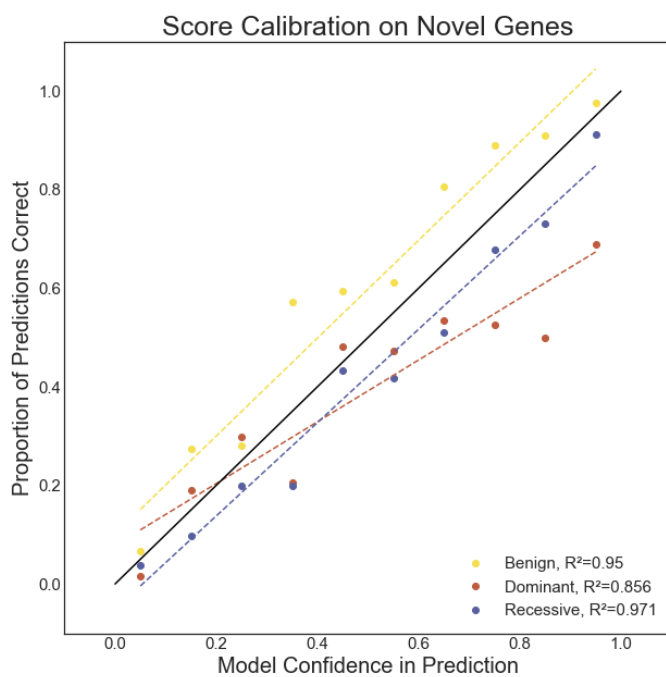

A

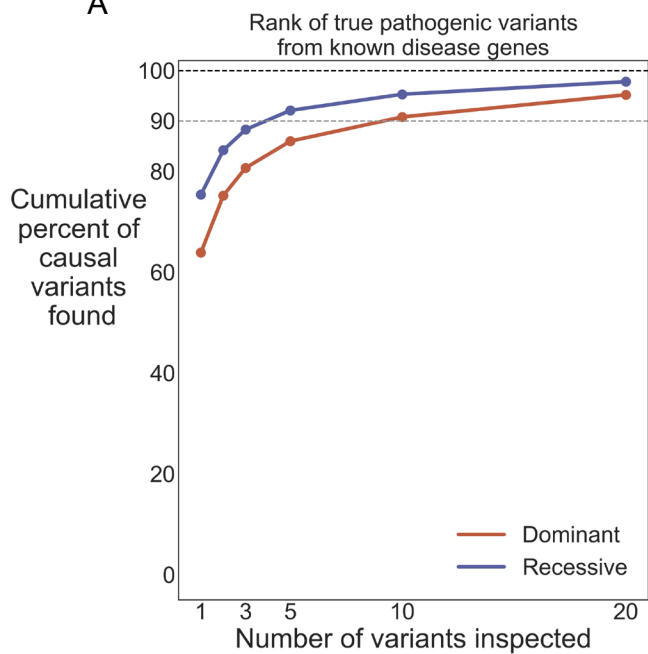

B

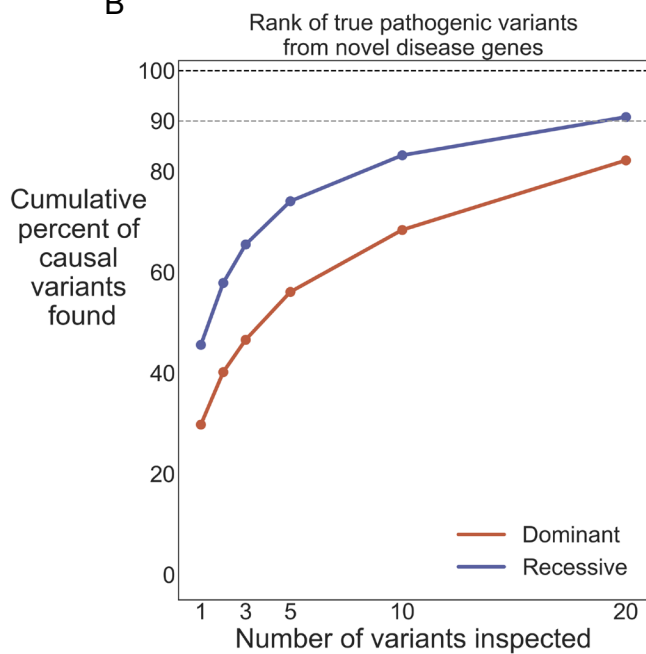

**Supplementary Table 1****Validation Set**

| Class Label | Precision | Recall | F1     | N   | auROC  | auPRC  |
|-------------|-----------|--------|--------|-----|--------|--------|
| Benign      | 0.9923    | 0.9884 | 0.9903 | 778 | 0.9987 | 0.9996 |
| Dominant    | 0.9541    | 0.963  | 0.9585 | 108 | 0.9991 | 0.9929 |
| Recessive   | 0.9310    | 0.9474 | 0.9391 | 114 | 0.9975 | 0.9789 |

**Known Genes Set**

| Class Label | Precision | Recall | F1     | N    | auROC  | auPRC  |
|-------------|-----------|--------|--------|------|--------|--------|
| Benign      | 0.8824    | 0.8797 | 0.881  | 2917 | 0.9799 | 0.9411 |
| Dominant    | 0.9239    | 0.8902 | 0.9068 | 6085 | 0.9752 | 0.9632 |
| Recessive   | 0.9130    | 0.9431 | 0.9278 | 7010 | 0.9805 | 0.9751 |

**Novel Genes Set**

| Class Label | Precision | Recall | F1     | N    | auROC  | auPRC  |
|-------------|-----------|--------|--------|------|--------|--------|
| Benign      | 0.9343    | 0.9109 | 0.9224 | 1234 | 0.9623 | 0.9771 |
| Dominant    | 0.5930    | 0.6448 | 0.6178 | 183  | 0.9359 | 0.6253 |
| Recessive   | 0.7765    | 0.7992 | 0.7877 | 513  | 0.9337 | 0.8598 |



**Supplementary Table 2**

| <b>Known Genes Set</b> | <b>MAVERICK</b> |            | <b>MAPPIN</b> |            |      |
|------------------------|-----------------|------------|---------------|------------|------|
| Variant Class          | Precision (%)   | Recall (%) | Precision (%) | Recall (%) | N    |
| Benign                 | 91.1            | 89.6       | 94.1          | 7.5        | 2541 |
| Dominant               | 87.8            | 86.3       | 60.5          | 81.5       | 2576 |
| Recessive              | 89.3            | 91.9       | 60.1          | 89.6       | 2945 |

| <b>Novel Genes Set</b> | <b>MAVERICK</b> |            | <b>MAPPIN</b> |            |      |
|------------------------|-----------------|------------|---------------|------------|------|
| Variant Class          | Precision (%)   | Recall (%) | Precision (%) | Recall (%) | N    |
| Benign                 | 94.8            | 91.0       | 97.7          | 8.0        | 1072 |
| Dominant               | 62.6            | 62.1       | 21.9          | 59.9       | 132  |
| Recessive              | 69.1            | 79.7       | 24.1          | 87.8       | 286  |

**Supplementary Table 3**

| <b>Known Genes Set</b> | <b>MAVERICK</b> |            | <b>ALoFT</b>  |            |      |
|------------------------|-----------------|------------|---------------|------------|------|
| Variant Class          | Precision (%)   | Recall (%) | Precision (%) | Recall (%) | N    |
| Benign                 | 50.0            | 9.1        | 0.0           | 0.0        | 22   |
| Dominant               | 92.4            | 86.0       | 69.4          | 71.1       | 1001 |
| Recessive              | 90.7            | 95.8       | 80.1          | 79.8       | 1538 |

| <b>Novel Genes Set</b> | <b>MAVERICK</b> |            | <b>ALoFT</b>  |            |     |
|------------------------|-----------------|------------|---------------|------------|-----|
| Variant Class          | Precision (%)   | Recall (%) | Precision (%) | Recall (%) | N   |
| Benign                 | 100.0           | 22.2       | 100           | 11.1       | 9   |
| Dominant               | 54.6            | 64.3       | 40.0          | 42.9       | 28  |
| Recessive              | 89.3            | 90.5       | 75.3          | 88.5       | 157 |

**Supplementary Table 4**

| <b>Known Genes Set</b> | MAVERICK      |            | PrimateAI     |            |      |
|------------------------|---------------|------------|---------------|------------|------|
| Variant Class          | Precision (%) | Recall (%) | Precision (%) | Recall (%) | N    |
| Benign                 | 91.5          | 89.7       | 83.0          | 52.2       | 2473 |
| Pathogenic             | 91.8          | 93.3       | 70.3          | 91.4       | 3062 |

| <b>Novel Genes Set</b> | MAVERICK      |            | PrimateAI     |            |      |
|------------------------|---------------|------------|---------------|------------|------|
| Variant Class          | Precision (%) | Recall (%) | Precision (%) | Recall (%) | N    |
| Benign                 | 95.2          | 91.6       | 94.7          | 56.3       | 1041 |
| Pathogenic             | 68.00         | 79.6       | 30.8          | 86.00      | 235  |

**Supplementary Table 6**

X-chromosome

| Class Label | Precision | Recall | F1     | N    | auROC  | auPRC  |
|-------------|-----------|--------|--------|------|--------|--------|
| Benign      | 0.9718    | 0.9727 | 0.9723 | 3333 | 0.9924 | 0.9955 |
| Dominant    | 0.3553    | 0.8801 | 0.5063 | 667  | 0.8849 | 0.4623 |
| Recessive   | 0.7383    | 0.1519 | 0.2520 | 1244 | 0.8749 | 0.5914 |

X-chromosome binary

| Class Label | Precision | Recall | F1     | N    | auROC  | auPRC  |
|-------------|-----------|--------|--------|------|--------|--------|
| Benign      | 0.9738    | 0.9697 | 0.9717 | 3333 | 0.9924 | 0.9955 |
| Pathogenic  | 0.9475    | 0.9545 | 0.951  | 1911 | 0.9924 | 0.9879 |
